# Supplementary material
Source: PubMed Central journal article supplement (PMC5576362)
Supplement: NIHMS898277-supplement-Supporting_Info.pdf [file NIHMS898277-supplement-Supporting_Info.pdf]

# Supporting Information

## Predictors of per- and polyfluoroalkyl substance (PFAS) plasma concentrations in 6-10 year old American children

Maria H. Harris<sup>\*,1,2</sup>, Sheryl L. Rifas-Shiman<sup>3</sup>, Antonia M. Calafat<sup>4</sup>, Xiaoyun Ye<sup>4</sup>,  
Ana Maria Mora<sup>5,6</sup>, Thomas F. Webster<sup>5</sup>, Emily Oken<sup>3,7</sup> and Sharon K. Sagiv<sup>1,2</sup>

<sup>1</sup>Center for Environmental Research and Children's Health, University of California, Berkeley  
School of Public Health, Berkeley, California, USA

<sup>2</sup>Division of Epidemiology, University of California, Berkeley School of Public Health,  
Berkeley, California, USA

<sup>3</sup>Obesity Prevention Program, Department of Population Medicine, Harvard Medical School and  
Harvard Pilgrim Health Care Institute, Boston, Massachusetts, USA

<sup>4</sup>Division of Laboratory Sciences, National Center for Environmental Health, Centers for  
Disease Control and Prevention, Atlanta, Georgia, USA

<sup>5</sup>Department of Environmental Health, Boston University School of Public Health, Boston,  
Massachusetts, USA

<sup>6</sup>Central American Institute for Studies on Toxic Substances, Universidad Nacional, Heredia,  
Costa Rica

<sup>7</sup>Department of Nutrition, Harvard School of Public Health, Boston, Massachusetts, USA

**\*Corresponding author:**

Maria H Harris, PhD

Center for Environmental Research and Children's Health  
University of California, Berkeley School of Public Health

1995 University Ave., Suite 265

Berkeley, CA 94720 USA

Telephone: (510) 642-9508

Fax: (510) 642-9083

Email: [mariaharris@berkeley.edu](mailto:mariaharris@berkeley.edu)

**9 pages, 4 tables**

Table S1. Unadjusted associations from bivariable linear regression models for predictors of PFAS concentrations in Project Viva mid-childhood (age 6-10 years) plasma samples (n=653)

|                                                                           | % Difference in PFAS concentration (95% CI) |                      |                      |                    |                     |                      |
|---------------------------------------------------------------------------|---------------------------------------------|----------------------|----------------------|--------------------|---------------------|----------------------|
|                                                                           | PFOA                                        | PFOS                 | PFHxS                | PFNA               | PFDeA               | Me-PFOA-AcOH         |
| Maternal pregnancy concentration of corresponding PFAS (per IQR increase) | 12.3 (6.2, 18.9)                            | 14.1 (7.4, 21.1)     | 21.3 (16.1, 26.7)    | 3.4 (-3.1, 10.4)   | -                   | 15.0 (5.0, 26.0)     |
| <b>Child Characteristics</b>                                              |                                             |                      |                      |                    |                     |                      |
| Child's age at blood draw (years)                                         | -15.0 (-19.2, -10.7)                        | -11.5 (-17.0, -5.6)  | -12.9 (-20.0, -5.1)  | -1.4 (-7.3, 4.9)   | -10.2 (-15.5, -4.6) | -18.4 (-26.6, -9.3)  |
| Year of blood draw                                                        |                                             |                      |                      |                    |                     |                      |
| 2007                                                                      | Ref                                         | Ref                  | Ref                  | Ref                | Ref                 | Ref                  |
| 2008                                                                      | 7.2 (-6.8, 23.2)                            | -4.4 (-20.2, 14.4)   | -3.0 (-23.8, 23.5)   | 39.1 (16.1, 66.5)  | 11.7 (-6.4, 33.3)   | 8.9 (-19.4, 47.1)    |
| 2009                                                                      | -21.1 (-31.4, -9.1)                         | -33.6 (-44.6, -20.3) | -36.1 (-49.9, -18.5) | 25.1 (4.3, 50.0)   | -6.9 (-22.1, 11.2)  | -34.9 (-51.9, -11.7) |
| 2010                                                                      | -36.3 (-44.9, -26.2)                        | -43.0 (-52.8, -31.1) | -48.2 (-59.8, -33.3) | 28.0 (6.0, 54.0)   | -18.2 (-32.0, -1.5) | -49.3 (-63.0, -30.4) |
| Sex                                                                       |                                             |                      |                      |                    |                     |                      |
| Male                                                                      | Ref                                         | Ref                  | Ref                  | Ref                | Ref                 | Ref                  |
| Female                                                                    | -2.0 (-10.0, 6.7)                           | -4.4 (-14.2, 6.4)    | -12.1 (-23.7, 1.4)   | -0.3 (-10.1, 10.4) | 3.8 (-6.2, 14.9)    | -0.4 (-16.5, 18.9)   |
| Race/ethnicity                                                            |                                             |                      |                      |                    |                     |                      |
| White                                                                     | Ref                                         | Ref                  | Ref                  | Ref                | Ref                 | Ref                  |
| Black                                                                     | -34.1 (-40.9, -26.5)                        | -36.8 (-45.1, -27.3) | -42.2 (-52.1, -30.2) | -3.2 (-15.9, 11.3) | -13.6 (-24.6, -1.0) | -48.7 (-59.5, -35.1) |
| Other                                                                     | -24.1 (-32.1, -15.2)                        | -25.7 (-35.6, -14.3) | -27.8 (-40.3, -12.6) | -7.0 (-19.3, 7.2)  | -14.6 (-25.6, -1.9) | -37.3 (-50.7, -20.4) |
| Breastfeeding duration                                                    |                                             |                      |                      |                    |                     |                      |
| <3 months                                                                 | Ref                                         | Ref                  | Ref                  | Ref                | Ref                 | Ref                  |
| 3-<6 months                                                               | 0.8 (-13.3, 17.3)                           | 1.3 (-16.2, 22.4)    | 0.3 (-22.5, 29.7)    | -3.5 (-20.0, 16.3) | 2.1 (-14.9, 22.5)   | -5.5 (-31.2, 29.8)   |
| ≥6 months                                                                 | 16.3 (5.7, 27.9)                            | 25.3 (11.2, 41.1)    | 27.7 (8.6, 50.2)     | -8.9 (-19.0, 2.5)  | 1.5 (-9.5, 13.9)    | 28.5 (5.2, 56.8)     |

|                                          |                      |                      |                      |                    |                     |                      |
|------------------------------------------|----------------------|----------------------|----------------------|--------------------|---------------------|----------------------|
| BMI in mid-childhood (percentile)        |                      |                      |                      |                    |                     |                      |
| Underweight/normal (<85th)               | Ref                  | Ref                  | Ref                  | Ref                | Ref                 | Ref                  |
| Overweight (85- <95th)                   | -10.1 (-20.8, 2.0)   | -10.0 (-23.4, 5.7)   | -15.5 (-31.7, 4.6)   | 0.1 (-14.3, 16.9)  | -5.5 (-18.8, 9.9)   | -8.8 (-30.1, 19.0)   |
| Obese (≥95th)                            | -22.6 (-31.4, -12.7) | -24.8 (-35.5, -12.4) | -28.2 (-41.4, -12.1) | 5.8 (-8.7, 22.6)   | -18.4 (-29.3, -5.8) | -23.0 (-40.2, -0.9)  |
| Fast food consumption                    |                      |                      |                      |                    |                     |                      |
| <1 per month                             | Ref                  | Ref                  | Ref                  | Ref                | Ref                 | Ref                  |
| 1-3 times per month                      | 1.0 (-10.2, 13.7)    | -4.7 (-18.0, 10.9)   | 0.3 (-17.8, 22.3)    | 10.3 (-4.4, 27.3)  | 5.5 (-8.4, 21.5)    | -4.4 (-25.3, 22.4)   |
| Once per week                            | -3.4 (-15.0, 9.9)    | -10.3 (-23.8, 5.7)   | -3.3 (-22.0, 20.0)   | 3.3 (-11.6, 20.6)  | -0.2 (-14.4, 16.3)  | -10.2 (-31.3, 17.4)  |
| ≥2 times per week                        | 16.0 (-3.9, 39.9)    | 5.9 (-16.6, 34.6)    | -4.0 (-29.9, 31.6)   | 22.5 (-2.4, 53.7)  | 12.3 (-10.2, 40.4)  | 37.8 (-6.9, 104.0)   |
| Time spent outdoors (in summer)          |                      |                      |                      |                    |                     |                      |
| Low                                      | Ref                  | Ref                  | Ref                  | Ref                | Ref                 | Ref                  |
| Medium                                   | 21.3 (7.6, 36.8)     | 27.3 (9.3, 48.4)     | 18.7 (-3.0, 45.4)    | 18.2 (2.2, 36.7)   | 17.4 (1.8, 35.4)    | 5.3 (-18.2, 35.6)    |
| High                                     | 25.3 (10.3, 42.4)    | 24.7 (6.0, 46.8)     | 16.0 (-6.4, 43.8)    | 21.5 (4.1, 41.8)   | 25.8 (8.1, 46.5)    | 16.8 (-10.7, 52.8)   |
| Time spent outdoors (in winter)          |                      |                      |                      |                    |                     |                      |
| Low                                      | Ref                  | Ref                  | Ref                  | Ref                | Ref                 | Ref                  |
| Medium                                   | 4.9 (-4.9, 15.7)     | 5.4 (-6.9, 19.5)     | -7.2 (-21.2, 9.3)    | 6.4 (-5.4, 19.8)   | -0.2 (-11.2, 12.1)  | 0.7 (-18.0, 23.6)    |
| High                                     | 2.4 (-11.2, 18.1)    | -2.3 (-18.4, 17.2)   | 16.7 (-7.9, 48.0)    | 8.1 (-8.9, 28.4)   | 2.7 (-13.3, 21.6)   | -4.8 (-29.3, 28.2)   |
| <b>Parental characteristics</b>          |                      |                      |                      |                    |                     |                      |
| Maternal age at enrollment (per 5 years) | 10.0 (6.0, 14.1)     | 13.0 (7.8, 18.4)     | 15.3 (8.3, 22.7)     | 1.3 (-3.2, 6.0)    | 3.5 (-1.0, 8.3)     | 23.6 (14.4, 33.5)    |
| Maternal race/ethnicity                  |                      |                      |                      |                    |                     |                      |
| White                                    | Ref                  | Ref                  | Ref                  | Ref                | Ref                 | Ref                  |
| Black                                    | -35.8 (-42.0, -29.0) | -37.6 (-45.2, -28.9) | -44.1 (-53.0, -33.6) | -2.3 (-14.2, 11.2) | -16.4 (-26.4, -5.1) | -47.6 (-57.9, -34.9) |
| Other                                    | -28.4 (-35.8, -20.1) | -28.9 (-38.3, -18.2) | -43.9 (-53.4, -32.4) | -3.6 (-16.2, 11.0) | -10.8 (-22.3, 2.4)  | -40.3 (-52.8, -24.5) |

|                                                      |                   |                   |                    |                    |                   |                     |
|------------------------------------------------------|-------------------|-------------------|--------------------|--------------------|-------------------|---------------------|
| <b>Maternal education</b>                            |                   |                   |                    |                    |                   |                     |
| <College                                             | Ref               | Ref               | Ref                | Ref                | Ref               | Ref                 |
| College                                              | 28.0 (16.1, 41.1) | 33.8 (18.3, 51.3) | 48.1 (25.7, 74.4)  | 7.2 (-5.0, 21.0)   | 12.7 (0.1, 27.0)  | 48.9 (21.2, 82.9)   |
| >College                                             | 41.3 (27.4, 56.7) | 53.2 (34.4, 74.7) | 73.8 (45.9, 106.9) | 0.0 (-12.1, 13.8)  | 18.8 (4.7, 34.8)  | 67.5 (34.6, 108.5)  |
| <b>Paternal education</b>                            |                   |                   |                    |                    |                   |                     |
| <College                                             | Ref               | Ref               | Ref                | Ref                | Ref               | Ref                 |
| College                                              | 37.1 (23.4, 52.3) | 44.6 (26.4, 65.4) | 72.8 (44.6, 106.5) | 7.2 (-5.8, 21.9)   | 22.1 (7.3, 39.0)  | 61.4 (29.1, 101.8)  |
| >College                                             | 34.3 (20.3, 50.0) | 36.6 (18.6, 57.2) | 43.8 (19.3, 73.3)  | -1.2 (-13.7, 13.0) | 22.2 (6.7, 40.0)  | 36.2 (7.8, 72.0)    |
| <b>Mother married or cohabitating</b>                |                   |                   |                    |                    |                   |                     |
| No                                                   | Ref               | Ref               | Ref                | Ref                | Ref               | Ref                 |
| Yes                                                  | 40.8 (23.1, 60.9) | 38.4 (16.7, 64.1) | 49.1 (18.8, 87.1)  | -7.2 (-21.3, 9.3)  | 17.3 (-0.2, 37.8) | 54.4 (16.5, 104.7)  |
| <b>Maternal parity</b>                               |                   |                   |                    |                    |                   |                     |
| 0                                                    | Ref               | Ref               | Ref                | Ref                | Ref               | Ref                 |
| ≥1                                                   | 5.3 (-3.4, 14.7)  | 1.4 (-9.0, 13.1)  | 0.2 (-13.3, 15.7)  | 1.6 (-8.4, 12.7)   | 1.0 (-8.8, 11.9)  | 12.2 (-6.1, 34.2)   |
| <b><i>Household Characteristics</i></b>              |                   |                   |                    |                    |                   |                     |
| <b>Annual household income</b>                       |                   |                   |                    |                    |                   |                     |
| ≤\$40K                                               | Ref               | Ref               | Ref                | Ref                | Ref               | Ref                 |
| \$>40–≤70K                                           | 8.8 (-6.2, 26.2)  | 30.6 (7.7, 58.5)  | 36.5 (5.1, 77.1)   | -4.1 (-20.7, 15.9) | 7.6 (-10.9, 29.8) | 62.8 (17.4, 125.8)  |
| \$>70–≤150K                                          | 29.3 (14.4, 46.2) | 34.1 (14.2, 57.4) | 34.6 (8.4, 67)     | 1.2 (-13.5, 18.5)  | 9.6 (-6.2, 28.1)  | 64.4 (25.4, 115.5)  |
| >\$150K                                              | 42.4 (24.4, 63.0) | 51.2 (26.8, 80.3) | 50.0 (18.3, 90.3)  | 3.1 (-13.3, 22.5)  | 21.9 (2.7, 44.6)  | 106.3 (53.2, 177.9) |
| <b>Carpeting or a rug in room where child sleeps</b> |                   |                   |                    |                    |                   |                     |
| No                                                   | Ref               | Ref               | Ref                | Ref                | Ref               | Ref                 |
| Yes                                                  | 22.5 (11.7, 34.2) | 32.8 (18.2, 49.2) | 38.9 (19.0, 62.1)  | 0.7 (-10.0, 12.7)  | 11.5 (-0.1, 24.3) | 49.8 (23.7, 81.4)   |

Carpeting or a rug in  
room where child  
spends most awake time

|     |                   |                   |                   |                   |                  |                   |
|-----|-------------------|-------------------|-------------------|-------------------|------------------|-------------------|
| No  | Ref               | Ref               | Ref               | Ref               | Ref              | Ref               |
| Yes | 21.3 (10.5, 33.1) | 30.5 (16.0, 46.9) | 43.0 (22.3, 67.2) | -3.1 (-13.4, 8.5) | 0.8 (-9.8, 12.5) | 37.7 (13.3, 67.4) |

***Neighborhood  
Characteristics***

|                                                                    |                |                |                |                 |                |                 |
|--------------------------------------------------------------------|----------------|----------------|----------------|-----------------|----------------|-----------------|
| Census tract median<br>household income (per<br>\$10,000 increase) | 5.7 (3.9, 7.6) | 6.9 (4.5, 9.3) | 6.5 (3.4, 9.8) | 0.4 (-1.8, 2.6) | 5.0 (2.8, 7.2) | 9.8 (5.8, 13.9) |
|--------------------------------------------------------------------|----------------|----------------|----------------|-----------------|----------------|-----------------|

---

Table S2. Predictors of linear and branched PFOS isomer (n-PFOS and sm-PFOS) concentrations in Project Viva mid-childhood (age 6-10 years) plasma samples (n=653)

|                                     | Unadjusted associations from bivariable linear regression models |                      | Adjusted associations from multivariable linear regression |                      |
|-------------------------------------|------------------------------------------------------------------|----------------------|------------------------------------------------------------|----------------------|
|                                     | n-PFOS                                                           | sm-PFOS              | n-PFOS                                                     | sm-PFOS              |
| <b><i>Child Characteristics</i></b> |                                                                  |                      |                                                            |                      |
| Child's age at blood draw (years)   | -10.6 (-16.1, -4.7)                                              | -14.2 (-19.5, -8.7)  | 7.9 (-1.5, 18.3)                                           | 9.6 (0.6, 19.4)      |
| Year of blood draw                  |                                                                  |                      |                                                            |                      |
| 2007                                | Ref                                                              | Ref                  | Ref                                                        | Ref                  |
| 2008                                | -5.1 (-20.6, 13.5)                                               | -5.8 (-20.9, 12.3)   | -4.1 (-19.9, 14.8)                                         | -6.1 (-20.7, 11.2)   |
| 2009                                | -33.4 (-44.3, -20.2)                                             | -35.5 (-46.0, -23.1) | -28.5 (-40.3, -14.2)                                       | -31.4 (-42.1, -18.7) |
| 2010                                | -42.0 (-51.9, -30.1)                                             | -47.0 (-55.9, -36.3) | -37.8 (-50.5, -21.7)                                       | -40.5 (-52.0, -26.2) |
| Sex                                 |                                                                  |                      |                                                            |                      |
| Male                                | Ref                                                              | Ref                  | Ref                                                        | Ref                  |
| Female                              | -4.1 (-13.8, 6.6)                                                | -5.7 (-15.2, 4.8)    | -2.4 (-12.3, 8.7)                                          | -4.6 (-13.7, 5.6)    |
| Race/ethnicity                      |                                                                  |                      |                                                            |                      |
| White                               | Ref                                                              | Ref                  |                                                            |                      |
| Black                               | -33.5 (-42.2, -23.5)                                             | -44.7 (-51.5, -36.8) |                                                            |                      |
| Other                               | -23.1 (-33.2, -11.3)                                             | -31.3 (-39.9, -21.5) |                                                            |                      |
| Breastfeeding duration              |                                                                  |                      |                                                            |                      |
| <3 months                           | Ref                                                              | Ref                  | Ref                                                        | Ref                  |
| 3-<6 months                         | -0.5 (-17.5, 20.0)                                               | 6.0 (-11.8, 27.3)    | -7.6 (-23.3, 11.3)                                         | 0.7 (-15.4, 20.0)    |
| ≥6 months                           | 22.2 (8.6, 37.5)                                                 | 36.0 (21.2, 52.6)    | 6.6 (-5.9, 20.7)                                           | 14.7 (2.0, 28.9)     |
| BMI in mid-childhood (percentile)   |                                                                  |                      |                                                            |                      |
| Underweight/normal (<85th)          | Ref                                                              | Ref                  | Ref                                                        | Ref                  |
| Overweight (85-<95th)               | -8.9 (-22.3, 6.8)                                                | -11.9 (-24.7, 3.1)   | -7.8 (-21.3, 8)                                            | -12.2 (-24.3, 1.8)   |
| Obese (≥95th)                       | -22.7 (-33.5, -10.0)                                             | -30.8 (-40.4, -19.7) | -6.6 (-20.6, 9.9)                                          | -9.8 (-22.5, 5.1)    |
| Fast food consumption               |                                                                  |                      |                                                            |                      |
| <1 per month                        | Ref                                                              | Ref                  | Ref                                                        | Ref                  |
| 1-3 times per month                 | -4.5 (-17.8, 10.8)                                               | -5.7 (-18.7, 9.3)    | -3.7 (-16.4, 10.9)                                         | -2.4 (-14.5, 11.5)   |
| Once per week                       | -9.6 (-23.1, 6.3)                                                | -12.3 (-25.3, 2.9)   | -8.9 (-22.1, 6.6)                                          | -9.9 (-22.2, 4.5)    |
| ≥2 times per week                   | 5.5 (-16.7, 33.7)                                                | 5.7 (-16.4, 33.7)    | 3.0 (-17.9, 29.2)                                          | 5.6 (-14.6, 30.6)    |

Time spent outdoors (in summer)

|        |                  |                   |                   |                  |
|--------|------------------|-------------------|-------------------|------------------|
| Low    | Ref              | Ref               | Ref               | Ref              |
| Medium | 24.8 (7.3, 45.2) | 29.3 (11.3, 50.2) | 15.9 (-1.1, 35.7) | 19.1 (2.7, 38.2) |
| High   | 21.6 (3.5, 42.8) | 29.8 (10.7, 52.2) | 15.3 (-3.2, 37.4) | 21.3 (2.9, 42.9) |

Time spent outdoors (in winter)

|        |                    |                    |                     |                     |
|--------|--------------------|--------------------|---------------------|---------------------|
| Low    | Ref                | Ref                | Ref                 | Ref                 |
| Medium | 5.2 (-7.0, 19.0)   | 5.6 (-6.6, 19.4)   | -4.0 (-15.5, 9.1)   | -6.3 (-16.8, 5.6)   |
| High   | -2.5 (-18.5, 16.6) | -0.5 (-16.7, 18.9) | -19.8 (-33.3, -3.5) | -20.9 (-33.5, -5.9) |

***Parental characteristics***

|                                          |                      |                      |                      |                     |
|------------------------------------------|----------------------|----------------------|----------------------|---------------------|
| Maternal age at enrollment (per 5 years) | 11.8 (6.7, 17.1)     | 16.0 (10.8, 21.4)    | -0.9 (-6.9, 5.4)     | -0.6 (-6.2, 5.4)    |
| Maternal race/ethnicity                  |                      |                      |                      |                     |
| White                                    | Ref                  | Ref                  | Ref                  | Ref                 |
| Black                                    | -34.4 (-42.3, -25.3) | -45.1 (-51.5, -37.8) | -25.7 (-36.9, -12.6) | -31.4 (-41.1, -20)  |
| Other                                    | -25.5 (-35.3, -14.3) | -36.5 (-44.5, -27.3) | -8.8 (-22.8, 7.7)    | -18.7 (-30.4, -4.9) |
| Maternal education                       |                      |                      |                      |                     |
| <College                                 | Ref                  | Ref                  | Ref                  | Ref                 |
| College                                  | 29.6 (14.7, 46.4)    | 44.0 (27.8, 62.3)    | 12.3 (-3.3, 30.5)    | 11.7 (-3.0, 28.6)   |
| >College                                 | 47.6 (29.7, 68.1)    | 65.6 (45.9, 88.1)    | 20.4 (1.9, 42.3)     | 18.1 (1.0, 38.1)    |
| Paternal education                       |                      |                      |                      |                     |
| <College                                 | Ref                  | Ref                  |                      |                     |
| College                                  | 40.1 (22.6, 60.2)    | 53.9 (35.3, 75.1)    |                      |                     |
| >College                                 | 32.2 (15.0, 52.1)    | 47.8 (29.2, 69.2)    |                      |                     |
| Mother married or cohabitating           |                      |                      |                      |                     |
| No                                       | Ref                  | Ref                  | Ref                  | Ref                 |
| Yes                                      | 32.9 (12.3, 57.3)    | 56.1 (32.2, 84.4)    | 1.0 (-18.1, 24.5)    | 7.6 (-11.6, 31.0)   |
| Maternal parity                          |                      |                      |                      |                     |
| 0                                        | Ref                  | Ref                  | Ref                  | Ref                 |
| ≥1                                       | 0.6 (-9.6, 12.0)     | 4.1 (-6.5, 15.9)     | 1.2 (-9.8, 13.6)     | 3.4 (-7.2, 15.2)    |

***Household Characteristics***

|                         |     |     |     |     |
|-------------------------|-----|-----|-----|-----|
| Annual household income |     |     |     |     |
| ≤\$40K                  | Ref | Ref | Ref | Ref |

|                                                               |                   |                    |                    |                     |
|---------------------------------------------------------------|-------------------|--------------------|--------------------|---------------------|
| \$>40–≤70K                                                    | 29.7 (7.0, 57.3)  | 39.4 (15.4, 68.4)  | 6.7 (-13.9, 32.3)  | 4.7 (-14.4, 28.1)   |
| \$>70–≤150K                                                   | 28.0 (9.1, 50.1)  | 52.8 (30.6, 78.7)  | -12.1 (-28.5, 8.0) | -7.3 (-23.6, 12.6)  |
| >\$150K                                                       | 43.4 (20.3, 70.9) | 75.4 (47.6, 108.4) | -15.0 (-32.8, 7.4) | -10.4 (-28.1, 11.6) |
| Carpeting or a rug in room where child sleeps                 |                   |                    |                    |                     |
| No                                                            | Ref               | Ref                | Ref                | Ref                 |
| Yes                                                           | 30.4 (16.2, 46.3) | 35.8 (21.2, 52.1)  | 18.3 (4.5, 33.8)   | 17.0 (4.2, 31.4)    |
| Carpeting or a rug in room where child spends most awake time |                   |                    |                    |                     |
| No                                                            | Ref               | Ref                | Ref                | Ref                 |
| Yes                                                           | 27.4 (13.4, 43.2) | 35.2 (20.5, 51.7)  | -1.9 (-13.7, 11.4) | -0.8 (-12, 11.8)    |
| Census tract median household income (per \$10,000 increase)  | 6.1 (3.8, 8.5)    | 8.7 (6.4, 11.1)    | 2.7 (0.0, 5.4)     | 3.3 (0.8, 5.9)      |

Table S3. Summary statistics for PFAS concentrations measured in maternal plasma samples from early pregnancy (median=9.7 weeks gestation) in Project Viva, in subset of population with mid-childhood PFAS measurements (n=440)

| PFAS analyte (ng/mL) | N (%) detect | LOD | Geometric Mean | Median | Minimum | Maximum |
|----------------------|--------------|-----|----------------|--------|---------|---------|
| PFOS                 | 440 (100)    | 0.2 | 24.21          | 21.1   | 4.6     | 115.0   |
| PFOA                 | 440 (100)    | 0.1 | 5.33           | 5.4    | 0.90    | 20.5    |
| PFHxS                | 438 (99.5)   | 0.1 | 2.53           | 2.5    | <LOD    | 43.2    |
| PFNA                 | 434 (98.6)   | 0.1 | 0.61           | 0.6    | <LOD    | 3.4     |
| Me-PFOA-AcOH         | 440 (100)    | 0.1 | 2.02           | 2.0    | 0.1     | 29.7    |
| PFDeA                | 242 (55.0)   | 0.1 | 0.11           | <LOD   | <LOD    | 1.0     |



Table S4. PFAS plasma geometric means by year of collection for Project Viva mid-childhood (age 6-10 years) samples, and PFAS serum geometric means for NHANES participants aged 12-19 in 2007-8 and 2009-10 cycles

| PFAS analyte<br>(ng/mL) | Project Viva mid-childhood geometric<br>mean (6-10 years) |                 |                 |                 | NHANES geometric<br>mean (12-19 years) |         |
|-------------------------|-----------------------------------------------------------|-----------------|-----------------|-----------------|----------------------------------------|---------|
|                         | 2007<br>(n=68)                                            | 2008<br>(n=223) | 2009<br>(n=207) | 2010<br>(n=155) | 2007-8                                 | 2009-10 |
| PFOS                    | 8.17                                                      | 7.81            | 5.43            | 4.66            | 11.30                                  | 6.84    |
| PFOA                    | 4.96                                                      | 5.31            | 3.91            | 3.16            | 3.91                                   | 2.74    |
| PFHxS                   | 2.95                                                      | 2.87            | 1.89            | 1.53            | 2.40                                   | 2.03    |
| PFNA                    | 1.30                                                      | 1.81            | 1.62            | 1.66            | 1.16                                   | 1.10    |
| Me-PFOSA-AcOH           | 0.34                                                      | 0.37            | 0.22            | 0.17            | 0.34                                   | 0.24    |
| PFDeA                   | 0.32                                                      | 0.36            | 0.29            | 0.26            | 0.23                                   | 0.22    |
